# Supplementary material for: In Situ Oxidation of Cu2O Crystal for Electrochemical Detection of Glucose
Source: MDPI journal article supplement (doi:10.3390/s19132926), 2019-07-02
Supplement: s1 [file s1]

# In Situ Oxidation of Cu<sub>2</sub>O Crystal for Electrochemical Detection of Glucose

Chenlin Lu, Zhipeng Li, Liwei Ren, Nan Su, Diannan Lu and Zheng Liu

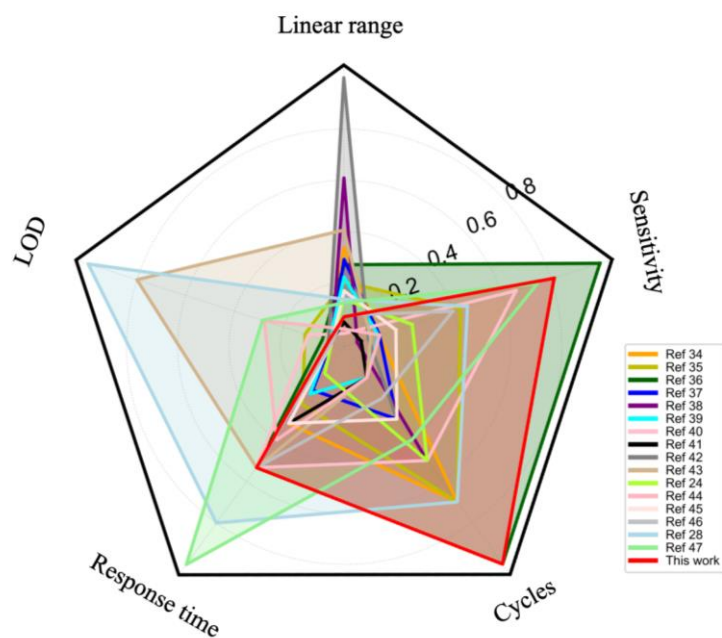

Figure S1. Comparison of different glucose sensors performance.

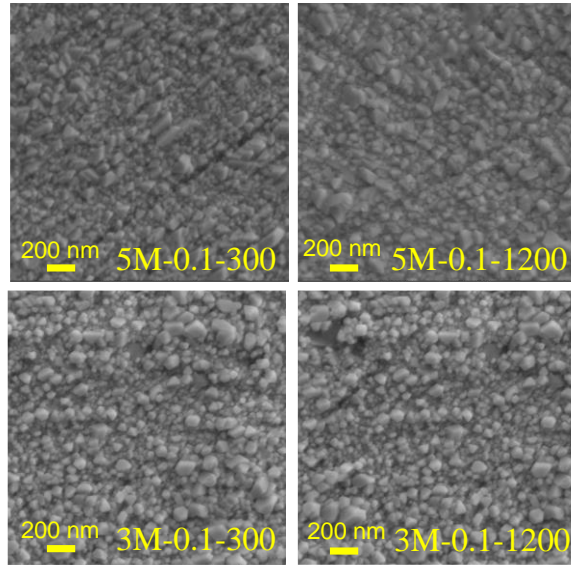

**Figure S2.** The SEM images of 5M-0.1-300, 5M-0.1-1200, 3M-0.1-300, 5M-0.1-1200.

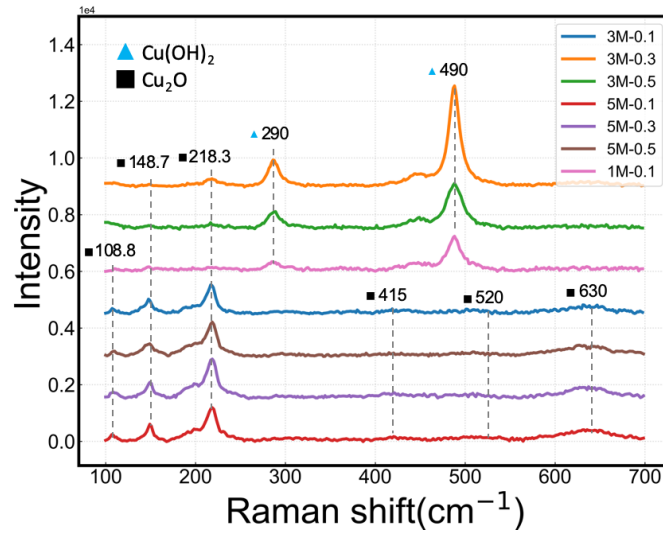

**Figure S3.** The Raman spectrum of the  $\text{Cu}_2\text{O}$  electrodes fabricated under different conditions.

The Raman spectra of 3M-0.1, 3M-0.3, 5M-0.1, 5M-0.3 and 5M-0.5 electrodes exhibit characteristic peaks at  $108.8\text{ cm}^{-1}$ ,  $148.7\text{ cm}^{-1}$ ,  $218.3\text{ cm}^{-1}$ ,  $520\text{ cm}^{-1}$  and  $630\text{ cm}^{-1}$ , which are attributed to  $\text{Cu}_2\text{O}$  [1,2]. The Raman spectra of 3M-0.5, 3M-0.3 and 1M-0.1 exhibit the characteristic peaks of  $\text{Cu}(\text{OH})_2$  at  $290\text{ cm}^{-1}$  and  $490\text{ cm}^{-1}$ , according to previous researches [2–4]. It should be noticed that the Raman spectrum of 3M-0.3 exhibits the both characteristic peaks of  $\text{Cu}_2\text{O}$  and  $\text{Cu}(\text{OH})_2$ . This agrees with the SEM in Figure S1 that shows the existence of nanoparticles and nanotubes.

## References

1. Chan, H.Y.H.; Takoudis, C.G.; Weaver, M.J. Oxide film formation and oxygen adsorption on copper in aqueous media as probed by surface-enhanced Raman spectroscopy. *J. Phys. Chem. B* **1999**, *103*, 357–365.
2. Deng, Y.; Handoko, A.D.; Du, Y.; Xi, S.; Yeo, B.S. In Situ Raman Spectroscopy of Copper and Copper Oxide Surfaces during Electrochemical Oxygen Evolution Reaction: Identification of CuIII Oxides as Catalytically Active Species. *ACS Catal.* **2016**, *6*, 2473–2481.
3. Hamilton, J.C.; Farmer, J.C.; Anderson, R.J. In situ Raman spectroscopy of anodic films formed on copper and silver in sodium hydroxide solution. *J. Electrochem. Soc.* **1986**, *133*, 739–745.
4. Reyter, D.; Odziemkowski, M.; Bélanger, D.; Roué, L. Electrochemically Activated Copper Electrodes Surface Characterization, Electrochemical Behavior, and Properties for the Electroreduction of Nitrate. *J. Electrochem. Soc.* **2007**, *154*, K36–K44.
